# Supplementary material for: Growth Factor Midkine Aggravates Pulmonary Arterial Hypertension via Surface Nucleolin
Source: PubMed Central journal article supplement (PMC7316741; doi:10.1038/s41598-020-67217-w), 2020-06-25

**Figure S1 (Figure 1c)**

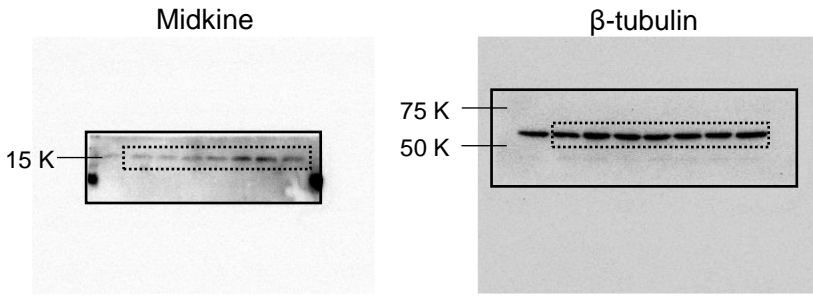

**Figure S2 (Figure 2f)**

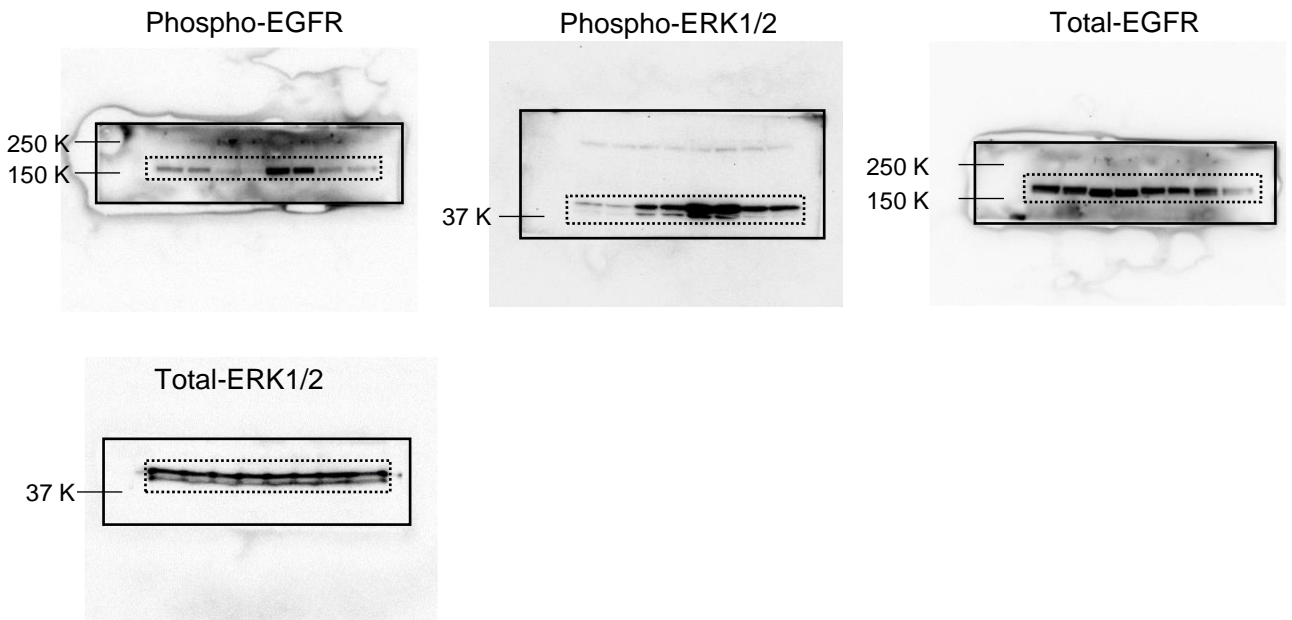

**Figure S3 (Figure 2g)**

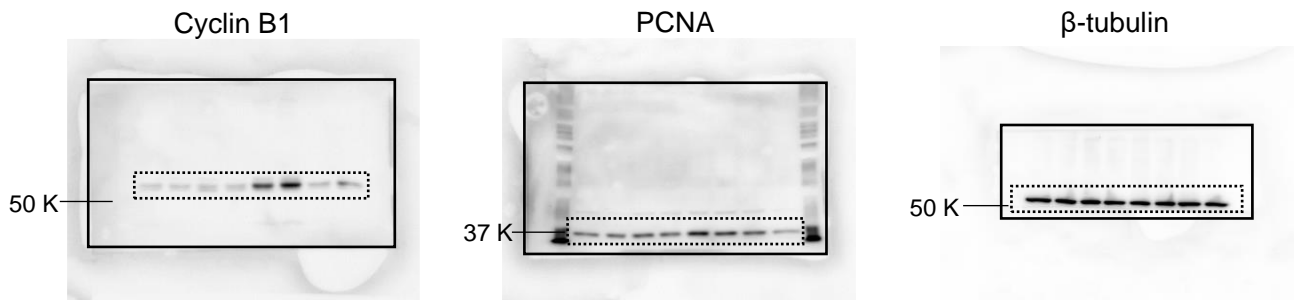

**Figure S4 (Figure 3d)**

Phospho-EGFR

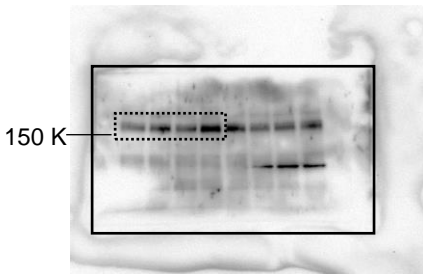

Phospho-ERK1/2

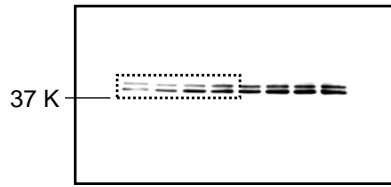

PCNA

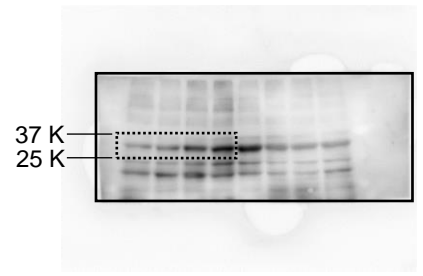

Total-EGFR

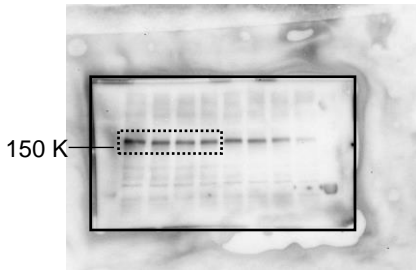

Total-ERK1/2

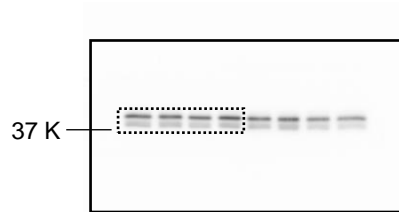

$\beta$ -tubulin

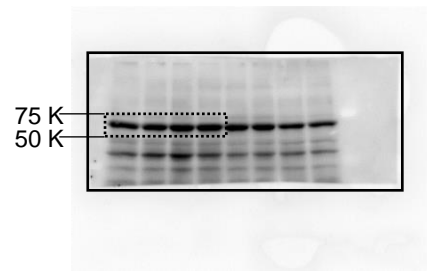

**Figure S5 (Figure 3e)**

Phospho-EGFR

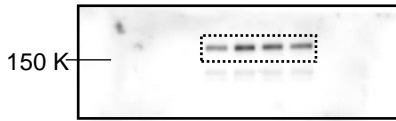

Phospho-ERK1/2

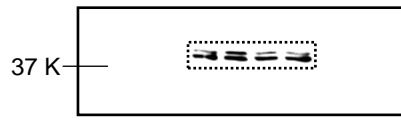

Phospho-ERK1/2  
(short exposure)

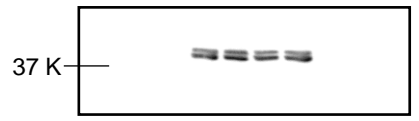

PCNA

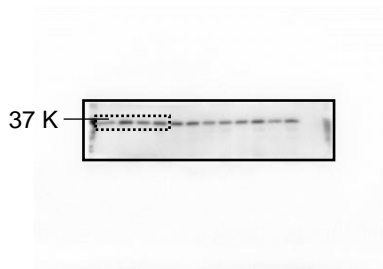

Total-EGFR

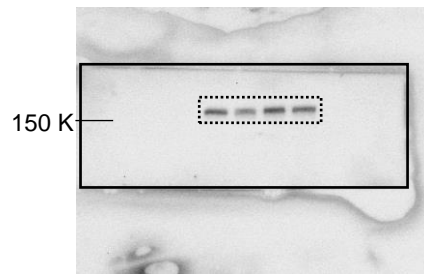

Total-ERK1/2

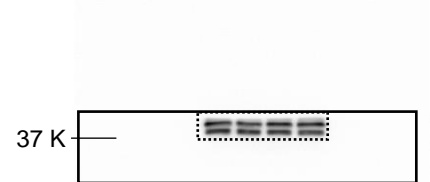

$\beta$ -tubulin

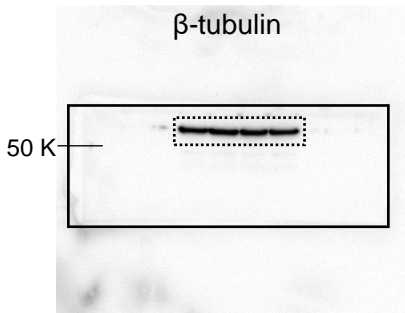

NCL

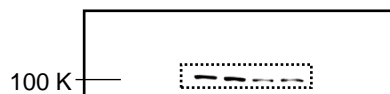

**Figure S6 (Figure 3f)**

Phospho-ERK1/2

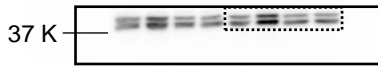

Total-ERK1/2

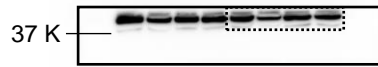

PCNA

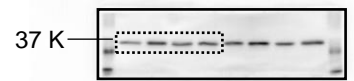

Total-EGFR

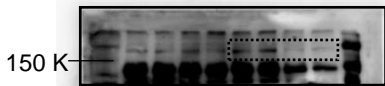

$\beta$ -tubulin

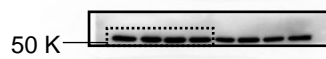

**Figure S7 (Figure 4a)**

NCL

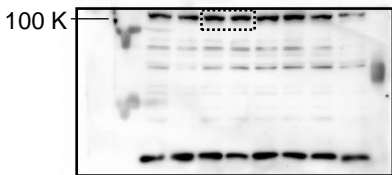

LRP1

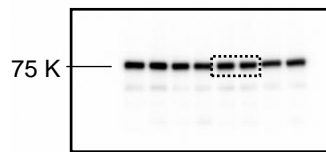

$\beta$ -tubulin

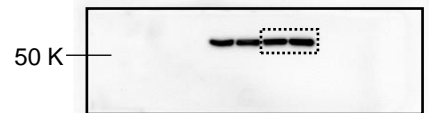

50 K

Integrin  $\beta$ 1

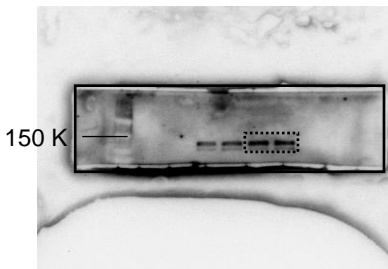

Total-EGFR

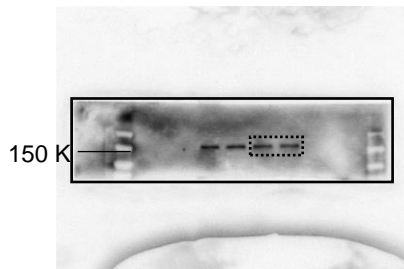

**Figure S8 (Figure 4b)**

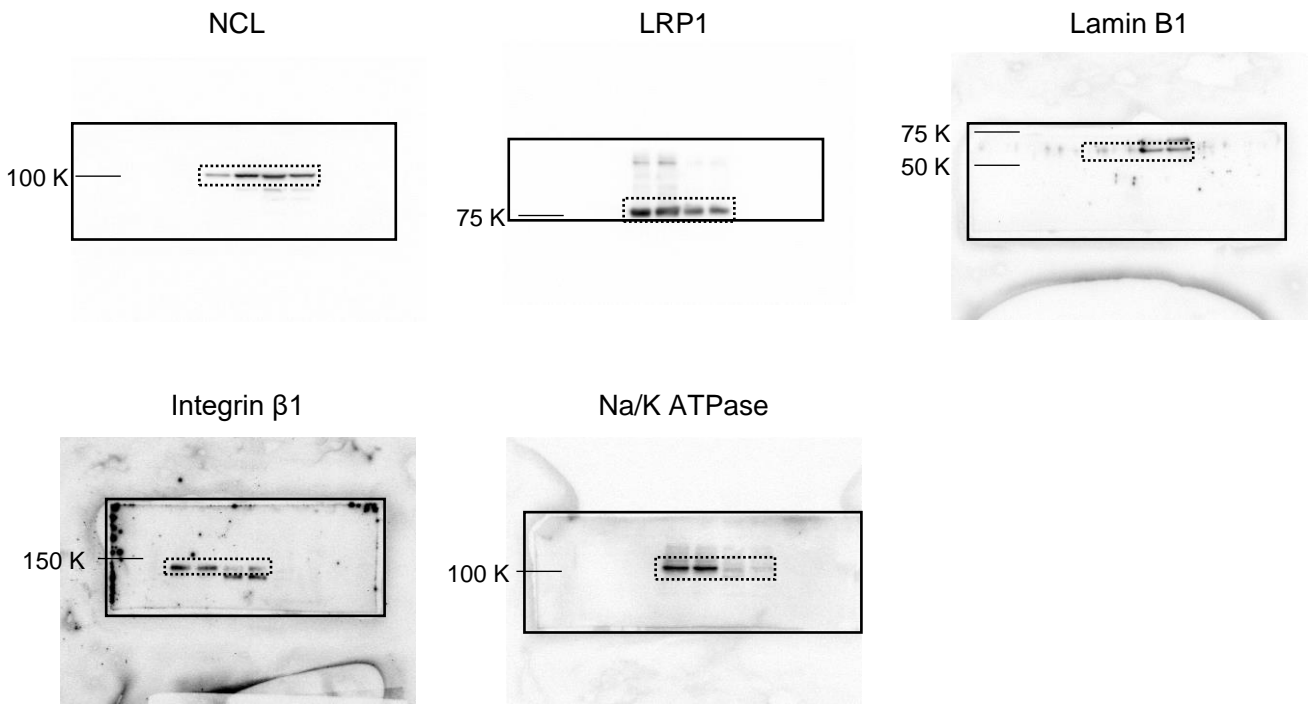

**Figure S9 (Figure 4e)**

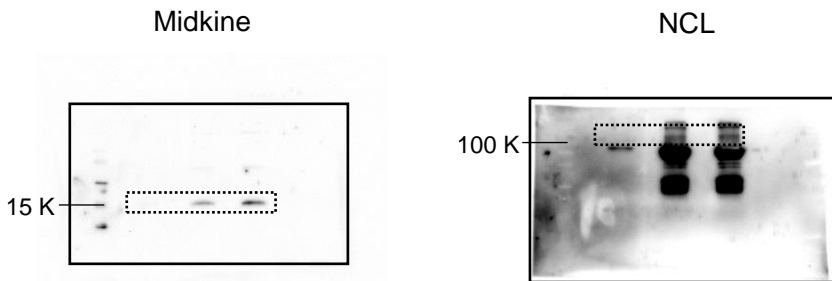

**Figure S10 (Figure 4f)**

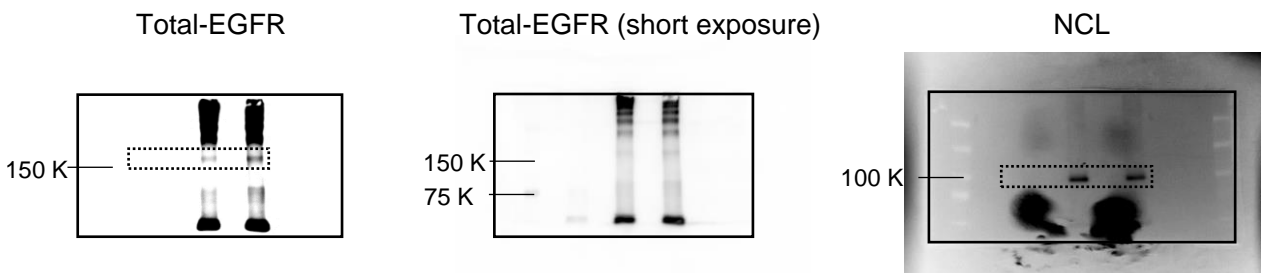

**Figure S11 (Figure 5a)**

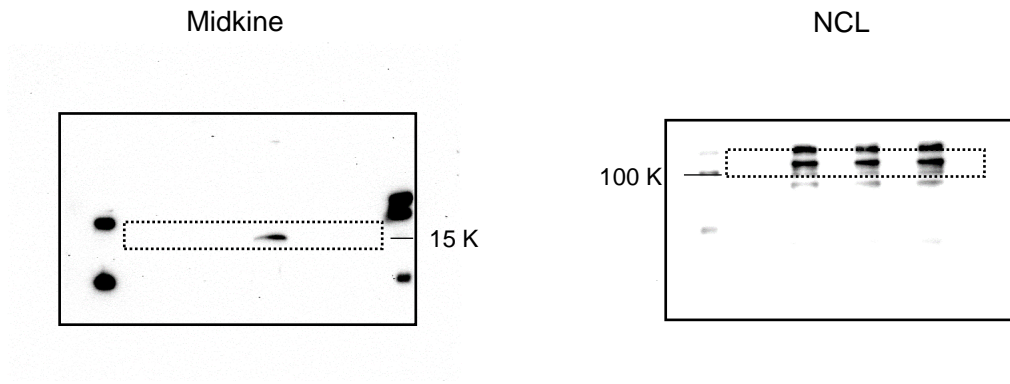

**Figure S12 (Figure 5b)**

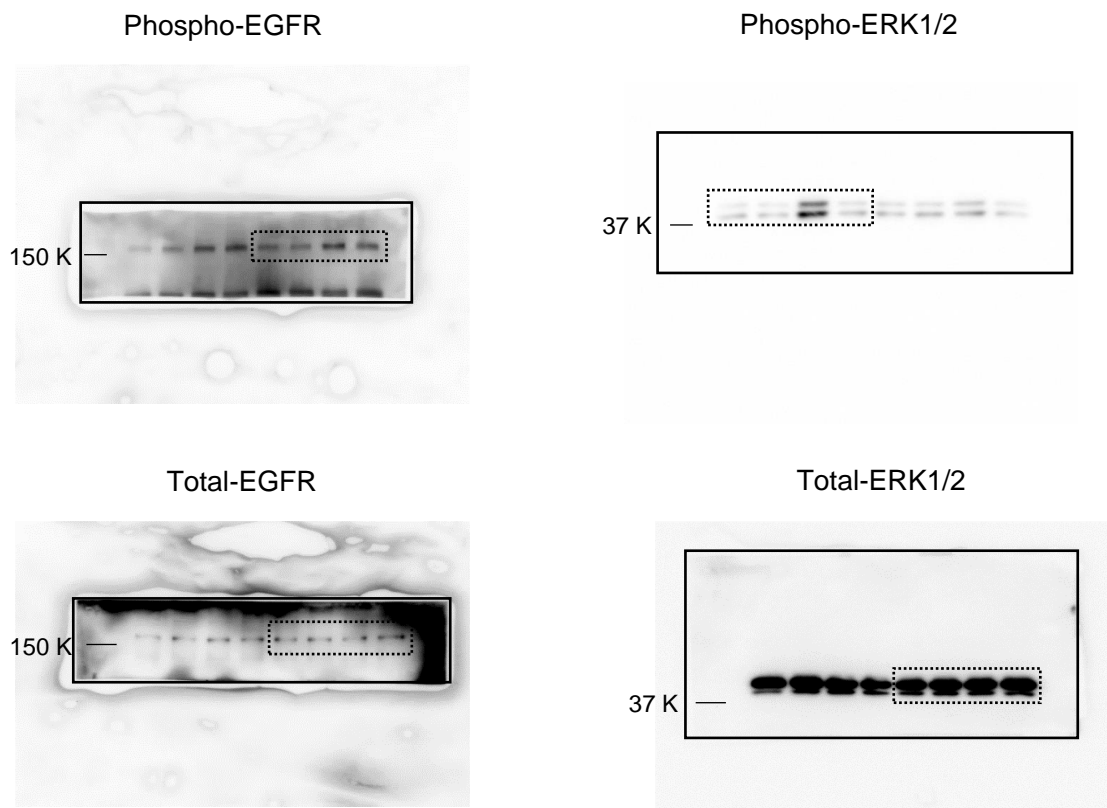

**Figure S13 (Figure 5f)**

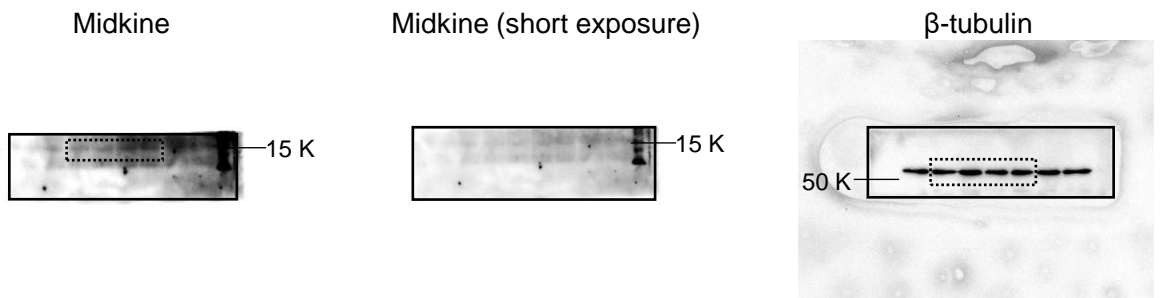

Supplement: 41598_2020_67217_MOESM2_ESM.pdf [file 41598_2020_67217_MOESM2_ESM.pdf]
